# Supplementary material
Source: publisher figshare collection journal article supplement (https://tandf.figshare.com/ndownloader/files/20104817)
Supplement: Supplementary file 1 [file 20104817]

**Supplementary Information**

**OCCURRENCE AND FATE OF PHARMACEUTICALS IN EFFLUENT AND SLUDGE FROM A WASTEWATER TREATMENT PLANT IN BRAZIL**

Ramiro Pereira Bisognina,*, Delmira Beatriz Wolffb, Elvis Carissimib, Osmar Damian Prestesc, Renato Zanellac

a Rio Grande do Sul State Universityfn the influent (UERGS), Três Passos, Rua Cipriano Barata, n. 211, 98600.000, RS, Brazil.

bPost-Graduate Program in Civil Engineering, Federal University of Santa Maria (UFSM), Santa Maria, Av. Roraima, n. 1000, 97105.900, RS, Brazil.

cLARP – Laboratory of Pesticide Residue Analysis, UFSM, Santa Maria, Av. Roraima, n. 1000, 97105.900, RS, Brazil

**Corresponding author:**

Ramiro Pereira Bisognin

Universidade Estadual do Rio Grande do Sul (UERGS)

Três Passos, Rua Cipriano Barata, n. 211, 98600.000, RS, Brazil.

Phone number: +55 3522 2895.

E-mail: ramirobisognin@yahoo.com.br (R. P. Bisognin).

Physico-chemical characteristics of the targeted pharmaceuticals in the present study

| Compounds | | Acronym | CAS number | Formula | pKaa | Water solubility (25°C, mg L−1)a |
| --- | --- | --- | --- | --- | --- | --- |
| Sulfonamides | Sulfathiazole | STZ | 72-14-0 | C9H9N3O2S2 | 2.2 /7.2 | 373 |
| Sulfamethoxazole | SM | 723-46-6 | C10H11N3O3S | 1.6/5.7 | 610 |
| Sulfadiazine | SDZ | 68-35-9 | C10H10N4O2S | 6.36 | 77 |
| Diaminopyrimidines | Trimethoprim | TMP | 738-70-5 | C14H18N4O3 | 7.12 | 400 |
| Fluoroquinolones | Ciprofloxacin | CIP | 85721-33-1 | C17H18FN3O3 | 6.09 | 30,000 |
| Enrofloxacin | ENR | 93106-60-6 | C19H22FN3O3 | 5.69 / 6.68 | 3397 |
| Ofloxacin | OFL | 82419-36-1 | C18H20FN3O4 | 5.97 / 9.28 | 28,260 |
| Norfloxacin | NOR | 70458-96-7 | C16H18FN3O3 | 6.34 / 8.75 | 179,000 |
| Tetracyclines | Tetracycline | TET | 60-54-8 | C22H24N2O8 | 3.30 | 231 |
| Oxytetracycline | OTC | 79-57-2 | C22H24N2O9 | 9.5 | 313 |
| Doxycycline | DOX | 564-25-0 | C22H24N2O8 | 3.09 | 630 |
| Macrolides | Tylosin | TYL | 1401-69-0 | C46H77NO17 | 7.73 | 5 |
| Non-steroidal anti-inflammatory drugs | Paracetamol | PRO | 103-90-2 | C8H9NO2 | 9.4 | 14,000 |
| Alkaloids | Caffeine | CAFF | 58-08-2 | C8H10N4O2 | 14.0 | 21,600 |
| Lincosamides | Clindamycin | CDM | 18323-44-9 | C18H33CIN2O5S | 7.79 | 30.61 |
| Anthelmintics | Fenbendazole | FBZ | 43210-67-9 | C15H13N3O2S | 9.59 | 6.09 |
| Nitroimidazoles | Metronidazole | MTZ | 443-48-1 | C6H9N3O3 | 2.38 | 9,500 |

Note: a: Values obtained from U.S. National Library of Medicine: <https://pubchem.ncbi.nlm.nih.gov>
